1 Malaria prevention knowledge, attitudes, and practices (KAP)  
2 among adolescents living in an area of persistent transmission  
3 in Senegal: Results from a cross-sectional study  
4

5 Fasiatou Tairou <sup>1\*</sup>, Saira Nawaz <sup>2</sup>, Marc Christian Tahita <sup>3</sup>, Samantha Herrera<sup>4</sup>, Babacar  
6 Faye <sup>1</sup>, Roger C K Tine <sup>1</sup>

7  
8 **Author Affiliation**  
9

10 <sup>1</sup> Department of Medical Parasitology, University Cheikh Anta Diop of Dakar, Senegal.

11 <sup>2</sup> Ohio state university, Center for Health Outcomes and Policy Evaluation Studies, United  
12 States of America.

13 <sup>3</sup> Clinical Research Unit of Nanoro, Direction régionale du Centre-Ouest de l'Institut de  
14 Recherche en Sciences de la santé, Burkina Faso

15  
16 <sup>4</sup> PATH, Washington, District of Columbia, United States of America

17  
18 \*Corresponding author

19  
20 Email: [fasiatht@yahoo.fr](mailto:fasiatht@yahoo.fr) (FT)

## 21 **Abstract**

22

## 23 **Introduction**

24

25 While malaria morbidity has sharply declined in several areas in Senegal, it remains an  
26 important problem in the southern part of the country, particularly among adolescents.  
27 Understanding adolescents' knowledge, attitudes, prevention and care-seeking practices is  
28 important to inform more targeted interventions aimed at optimizing adolescents' uptake of  
29 malaria prevention and control measures. This study assessed malaria-related knowledge,  
30 attitudes, and practices (KAP) among adolescents living in a highly persistent transmission  
31 area in Senegal.

32

## 33 **Methods**

34

35 A community-based cross-sectional survey was conducted among 391 adolescents living in the  
36 Saraya health district. A multistage random sampling technique was used to select households.  
37 An electronic questionnaire developed on Open Data Kit (ODK), was used to collect data on  
38 socio-demographic characteristics, household assets, adolescents' knowledge of malaria, as  
39 well as their attitudes with regards to malaria prevention, and care-seeking behaviors. Bivariate  
40 and multivariate analyses were performed to assess factors associated with adolescents' KAP  
41 towards malaria.

42

## 43 **Results**

44

45 Nearly, one-third of the participants had good knowledge of malaria (34.4%) and good practice  
46 in regards to malaria preventive measures (32.8%) while approximately three-quarters had a  
47 positive attitude (75.1%) and good care-seeking behavior (73.8%) regarding malaria.  
48 Multivariate analysis revealed that a primary (aOR=5.43, p=0.002) or secondary level of  
49 education (aOR=10.41, p=0.000) was associated with good knowledge of malaria

50 transmission, signs, and prevention measures. Male individuals had lower knowledge  
51 compared to female ones (aOR=0.40, p=0.001). Individuals belonging to households from the  
52 fourth (aOR=0.29, p=0.015), second (OR=0.13, p=0.000), and lowest (aOR=0.18, p=0.001)  
53 wealth quintiles were less likely to have a positive attitude towards malaria compared to those  
54 from households in the highest wealth quintile. A positive attitude was two times more likely  
55 to be (aOR=2.32, p=0.011) associated with good practice of prevention measures compared to  
56 adolescents who demonstrated negative attitudes. Individuals from households in the fourth  
57 (aOR=0.40, p=0.018), middle (aOR=0.32, P=0.03), and second (aOR=0.44, p=0.035) wealth  
58 quintiles were less likely to use malaria prevention measures compared to those from  
59 households in the highest wealth quintile.

## 60 **Conclusion**

61  
62 The study revealed that adolescents, generally have poor levels of malaria knowledge and low  
63 uptake of malaria prevention and control interventions. Targeted interventions for high-risk  
64 adolescents are needed, that focus on improving their knowledge of the disease and effective  
65 preventive measures, and on increasing their access to health care services and LLINs.

66

## 67 **Introduction**

68 Malaria remains a severe global public health problem, despite important efforts to control the  
69 disease. Malaria cases declined globally from 238 million in 2000 to 229 million in 2019 [1],  
70 while the incidence rate decreased from 80 per 1000 population at risk in 2000 to 57 in 2019.  
71 [1]. However, the Coronavirus (COVID-19) pandemic has disrupted malaria control activities,  
72 threatening progress in the fight against the disease [2,3], leading in 2020 to an increase in  
73 malaria morbidity and mortality worldwide, with an estimated 241 million cases and 627 000  
74 deaths [4]. The incidence rate (per 1000 population at risk) increased from 57 in 2019 to 59 in  
75 2020 [1]. Most of these cases occurred in Sub-Saharan Africa (SSA), with an estimated 228

76 million cases and 602 000 deaths in 2020 [4]. In recent years, multiple studies reported  
77 increased risk or higher prevalence of malaria among old children and adolescents across  
78 several SSA countries, including Kenya [5], Malawi [6,7], Tanzania [8], Democratic Republic  
79 of Congo [9] and Senegal [10], suggesting a shift of the disease burden from children under  
80 five years old to older children and adolescents.

81 In Senegal, malaria is endemic in most of the country, with an upsurge during the rainy season  
82 [11]. Malaria control relies on prompt and accurate diagnosis, treatment using artemisinin-  
83 based combination therapy combined with preventive measures such as use of long-lasting  
84 insecticide-treated nets (LLINs), indoor residual spraying (IRS), intermittent preventive  
85 treatment in pregnant women and children. The scaling-up of these interventions has led to a  
86 substantial reduction in the malaria burden in the country. Proportional morbidity has  
87 decreased from 4.9% in 2015 to 3.3% in 2019, and proportional mortality from 3.5% in 2015  
88 to 1.7% in 2019 [12]. However, an increase in malaria burden was observed in 2020, the  
89 proportional morbidity and mortality increased to a level close to the observed trends in 2015;  
90 respectively 3.8% and 2.1% [13,14]; and the majority of these malaria cases occurred in the  
91 three southern regions of Kolda, Tambacounda, and Kedougou [13,14]. In addition, the  
92 Senegalese National Malaria Control program (NMCP) through longitudinal routine data has  
93 shown an important increase in malaria cases among older children (15 to 19 years) compared  
94 to children under-five years old. The observed upward trend in malaria risk among older  
95 children and adolescents could be due to suboptimal use of preventive measures [15,16] and  
96 their behavioral patterns, such as staying outdoors in the evening hours when mosquitos are  
97 most active [16,17].

98 Given this shift in the malaria burden, it has become increasingly important to develop  
99 strategies to improve the use of malaria prevention measures among this population.

100 Appropriation of any control program by the population and their willingness to act is largely  
101 influenced by their level of understanding, attitude, and perception towards the disease and  
102 existing control measures [18,19]. Hence, to promote the use of malaria interventions among  
103 adolescents, it is necessary to understand their knowledge, attitudes, and perceptions of the  
104 disease. Knowledge, attitudes, and practices (KAP) surveys are common tools that can capture  
105 critical information to guide the design of control interventions, in order to ensure community  
106 involvement, acceptance, and adherence [20,21]. Malaria KAP surveys have been conducted  
107 in many African countries [22–32]; however, to our knowledge, there is a scarcity of data on  
108 malaria knowledge, attitudes, and practices among adolescents in Senegal, specifically those  
109 living in rural areas with high malaria transmission. Therefore, the present study sought to  
110 assess malaria related knowledge (causes, symptoms, prevention methods), attitudes towards  
111 the disease, uptake of control and prevention practices and care-seeking behaviors among  
112 adolescents living in areas with persistent malaria transmission in Senegal. In addition, the  
113 study explored factors associated with adolescent knowledge, attitudes, and practices towards  
114 malaria. The main objective of this study was to generate evidence that can guide the NMCP  
115 to design social and behavior change interventions tailored to adolescents, in order to raise their  
116 awareness and improve their uptake of malaria control and prevention measures.

## 117 **Methods**

### 118 **Study area and design**

119  
120 A community-based cross-sectional survey was conducted in the health district of Saraya in  
121 November 2021. The health district of Saraya is located in the Kedougou region in the south-  
122 eastern part of Senegal, 800 km from the capital, Dakar. The district shares a border with Mali  
123 to the east, Guinea to the south, the region of Tambacounda to the north, and the health district  
124 of Kedougou to the west. The health district occupies a land area of 6,837 sq km. The  
125 population was estimated to be around 66,017 inhabitants in 2021 [33] and the district has 1  
126 health center, 22 health posts, 28 health huts, and 78 villages with a village volunteer for  
127 malaria case management (“DSDOM”, *Dispensateur de soins à domicile*). The climate is  
128 Sudano-Guinean with a dry season and a rainy season. Malaria is meso-endemic and stable in  
129 Saraya, with a long transmission season lasting 4 to 6 months from July to December.  
130 Transmission intensity remains high during the rainy season, with a high biting rate (25  
131 bites/person/night ) [34] and high morbidity during the transmission period. The major vectors  
132 are *Anopheles gambiae*, *An. arabiensis* sl, *An. funestus* and *An. nili* [35]. Malaria incidence  
133 (per 1000 population at risk ) has steadily increased from 379.8 in 2019, to 607.6 in 2020, and  
134 up to 744.7 in 2021 [13,14].

### 135 136 **Study population and sampling technique**

137  
138 A multistage random sampling technique was used to select study participants. We first  
139 selected the four health posts (out of 22 total) that reported the highest number of malaria cases  
140 in 2020 (Diakhaling, Khossanto, Mamakhono, Sambrambougou) in the Saraya health district.  
141 In the second stage, thirty clusters, representing fifteen villages in the catchment areas of the  
142 targeted health posts, were selected using a random sampling process with probability

143 proportional to the village's population size (PPS). The third stage consisted of selecting  
144 households to be surveyed in each village using the compact segment sampling method. A map  
145 of each village was drawn and then was divided into segments so that each segment included  
146 approximately 13 adolescents. Segments were numbered and then one segment was randomly  
147 selected. All the households in the segment were selected for inclusion in the survey [36,37].  
148 Households were visited by surveyors, and in each household, all resident adolescents aged 10  
149 to 19 years old were enrolled in the study after consenting.

150

## 151 **Data collection method**

152

153 The study questionnaire was developed using the Open Data Kit (ODK) platform. The  
154 questionnaire was first designed in French then translated into Malinké, the local language in  
155 the study area. The questionnaire included closed questions that focused on the following  
156 topics: i) socio-demographic information of the participant and the household head, ii)  
157 household assets, iii) knowledge on malaria transmission, signs and symptoms of malaria, and  
158 how to prevent malaria, iv) prevention practices, v) attitudes toward malaria and, vi) care  
159 seeking practices for malaria. The questionnaire was pretested in Saraya city, which was not  
160 one of the study sites. The pretest was conducted to check for accuracy and the questionnaire  
161 was modified based on pilot study results.

162

163 Data were collected by trained field workers, using android tablets. The study team was trained  
164 on the study protocol, the questionnaire, and on the consent process. During the data collection  
165 phase, monitoring visits were performed for data quality checks and to assess compliance with  
166 the study protocol including informed consent requirements. Eligible participants included  
167 adolescents aged 10-19 years old who had lived in the selected households for at least six  
168 months.

169

## 170 **Outcome variables**

171

172 The main outcomes assessed in this study were: malaria knowledge, attitudes, uptake of  
173 malaria prevention and control practices, and care-seeking practices for fever.

174 Three items were used to assess participants' knowledge on malaria: (1) correct identification  
175 of the mode of transmission, identification of the signs and symptoms of malaria, and  
176 knowledge of methods to prevent malaria. A knowledge score was calculated by summing the  
177 participant's score across the three knowledge questions. A participant who described a  
178 mosquito bite as the mode of transmission for malaria was given a score of one, otherwise the  
179 participant was assigned a score of zero. For knowledge on malaria symptoms, a score of one  
180 was granted for each correct answer for the main symptoms of malaria: fever, headache, chills,  
181 abdominal pain, and vomiting. For knowledge of how to prevent malaria, a score of one was  
182 given to participants who correctly reported a bed net as a means to prevent malaria, and half  
183 point was given if the participant identified any of the other following prevention measures:  
184 mosquito coils, wearing long clothes, insecticide spray, weeding, or sewage disposal. Malaria  
185 knowledge was categorized into two levels using the median of the total score as cut off.  
186 Participants were classified as having a poor (below or equal to the median) or a good (above  
187 the median) level of knowledge on malaria.

188

189 To assess malaria attitudes, six items related to the population at risk of malaria, prevention,  
190 and treatment were used. A score of one was given for a correct answer and zero for a wrong  
191 answer. An attitude score was estimated by adding up each participant 'score across the six  
192 variables. Participants that scored the median of the total score or above were considered  
193 having a positive attitude, and the others as having a negative attitude.

194

195 A variable to assess the practice of the participant with regard to malaria prevention was  
196 defined considering bed net ownership and use of a bed net more than three times in a week or



197 every night [28,29]. Participants who own a bed net and use this more than three times in a  
198 week or every night, are categorized as having a good prevention practice, whereas bad  
199 prevention practices were considered those who do not have a bed net, and those who possess  
200 a net but do not use it at least 3 times a week.

201  
202 Care-seeking practices for malaria was assessed as whether the adolescent sought care at a  
203 health facility (specifically a health center, health post, health hut, or DSDOM) for recent  
204 malaria within 24 hours at the onset of the symptoms. Adolescents who sought care at a health  
205 facility within 24 hours were considered to have good care-seeking practice, otherwise, they  
206 were considered as having bad care-seeking practice.

207  
208 Other covariates assessed included socio-demographic factors of the adolescent and the  
209 household head (age, sex, education level, occupation, ethnicity, marital status, wealth index).  
210 Wealth index was calculated based on household assets (water source, type of toilet, ownership  
211 of radio, TV, bicycle, fridge, combustible) and household material characteristics (type of wall,  
212 type of floor, type of roof) using a principal component analysis [38,39]. The index was  
213 categorized into five levels (highest, fourth, middle, second, and lowest).

## 215 **Sample size calculation**

216 The sample size (n) was calculated using the Schwartz formula:

217

$$218 \quad Z^2P(1-P)$$

219  $n = \frac{\quad}{d^2}$  , where  $Z=1.96$  is the z statistic for a confidence level of 5%

220

221 P, the proportion of bed-net use among children under five years of age was considered for the

222 sample size calculation, as we did not find a KAP study conducted on adolescents in the study

223 area.

224 d, the precision, was set at 0.05.

225 Based on this formula, the study sample size was 362. Considering a non-response rate of 8%

226 the required sample size was set at 391 participants.

## 227 **Data management and analysis**

228 A unique identifier is attributed to each participant for confidentiality. The data collected were

229 extracted from the server and checked for the completeness and consistencies. Cleaned data

230 were analyzed using STATA software (Stata Corp 2016). Continuous variables were described

231 as mean, standard deviation. Categorical variables were presented as frequency and percentage.

232 Bivariate and multivariate logistic regressions were performed to assess factors that are related

233 to adolescents' malaria-related knowledge, attitudes, and practices with cluster robust standard

234 error to account for the study design. Variables with a  $p \leq 0.25$  in the bivariate analysis, were

235 introduced in the multivariable regression models [38,40]. Odds ratios of these models were

236 derived from the final model with 95% confidence interval (CI). Akaike's Information Criteria

237 (AIC) and Bayesian Information Criteria (BIC) were used for model selection. The significance

238 level for the final models was set at 5% (two sided). The goodness fit of the model was assessed

239 using Hosmer- Lemeshow test.

240

241

242

## 243 **Ethical considerations**

244 The study protocol was approved by the Institutional Ethics Committee of University Cheikh  
245 Anta Diop of Dakar (CER/UCAD/AD/MSN /039/2020). The protocol was presented to the  
246 staff of the health district to seek authorization to conduct the study. Authorization to conduct  
247 the study was also sought from community leaders in the study area. Participation in the study  
248 was voluntary. Written informed consent was sought from the parents/guardians of all  
249 adolescents aged 10-17 years old. In addition, written assent was sought from adolescents aged  
250 15-17 years old. Furthermore, older adolescents, aged from 18-19 years old were invited to  
251 provide a written consent for their participation. No personal identifiable data was collected in  
252 the study. A unique identifier was attributed to each participant. All the data collected for the  
253 study was kept confidential, with restricted access to the study staff, only for the study purpose.

## 254 **Results**

### 255 **Study participants characteristics**

256 Overall, 391 participants, aged 10 to 19 years old (mean age= 13. 8± 3.1) were enrolled in the  
257 study. Most of the participants (56.0%) were female and had (60.6%) primary school level of  
258 education. The majority of the participants belonged to the Malinke ethnic group (78.3%) and  
259 forty-eight percent (48.1%) of them were students (Table 1).

260 Table 1. Socio-demographic characteristics of the study participants  
261

| <b>Variable</b>                            | <b>Category</b> | <b>Frequency</b> | <b>Percentage</b> |
|--------------------------------------------|-----------------|------------------|-------------------|
| <b>Characteristics of the participants</b> |                 |                  |                   |
| <b>Age (in years)</b>                      | 10 – 14         | 232              | 59.3%             |
|                                            | 15 - 19         | 159              | 40.7%             |
| <b>Sex</b>                                 | Female          | 219              | 56.0%             |
|                                            | Male            | 172              | 44.0%             |
| <b>Ethnicity</b>                           | Malinke         | 306              | 78.3%             |
|                                            | Pular           | 62               | 15.9%             |

|                                                |                  |     |       |
|------------------------------------------------|------------------|-----|-------|
|                                                | Other†           | 23  | 5.9%  |
| <b>Educational level</b>                       | No education     | 68  | 17.4% |
|                                                | Koranic school   | 52  | 13.3% |
|                                                | Primary          | 237 | 60.6% |
|                                                | Secondary        | 34  | 8.7%  |
| <b>Occupation</b>                              | No occupation    | 89  | 22.8% |
|                                                | Student          | 188 | 48.1% |
|                                                | Household maid   | 24  | 6.1%  |
|                                                | Farmer           | 14  | 3.6%  |
|                                                | Gold digger      | 45  | 11.5% |
|                                                | Vendor           | 13  | 3.3%  |
|                                                | Workers          | 13  | 3.3%  |
|                                                | Other*           | 5   | 1.3%  |
| <b>Wealth index</b>                            | Highest          | 78  | 19.9% |
|                                                | Fourth           | 78  | 19.9% |
|                                                | Middle           | 79  | 20.2% |
|                                                | Second           | 78  | 19.9% |
|                                                | Lowest           | 78  | 19.9% |
| <b>Characteristics of the household's head</b> |                  |     |       |
| <b>Age (in years)</b>                          | <29              | 34  | 8.7%  |
|                                                | 30-39            | 40  | 10.2% |
| <b>Sex</b>                                     | 40-49            | 40  | 10.2% |
|                                                | 50-59            | 49  | 12.5% |
|                                                | 60-69            | 40  | 10.2% |
|                                                | >=70             | 14  | 3.6%  |
|                                                | Missing          | 174 | 44.5% |
|                                                | Female           | 25  | 6.4%  |
| <b>Educational level</b>                       | Male             | 363 | 92.8% |
|                                                | Missing          | 3   | 0.7%  |
|                                                | No education     | 164 | 41.9% |
|                                                | Koranic school   | 135 | 34.5% |
|                                                | Primary school   | 80  | 20.5% |
|                                                | Secondary school | 9   | 2.3%  |
| <b>Occupation</b>                              | Missing          | 3   | 0.8%  |
|                                                | None             | 17  | 4.3%  |
|                                                | Farmer           | 169 | 43.2% |
|                                                | Gold digger      | 135 | 34.5% |
|                                                | Vendor           | 21  | 5.4%  |
|                                                | Workers          | 22  | 5.6%  |
|                                                | Others**         | 24  | 6.1%  |
| <b>Marital status</b>                          | Missing          | 3   | 0.8%  |
|                                                | Married          | 382 | 97.7% |

|           |   |      |
|-----------|---|------|
| Others*** | 6 | 1.5% |
| Missing   | 3 | 0.8% |

262 † Dialounke, Bambara, Dogon, Bosso and Mossi

263 \* Community health worker and apprentice

264 \*\* Commhealthhealth worker, imam, head of the village, shepherd, apprentice, housewife

265 \*\*\* divorced and widower

## 266 Knowledge about malaria causes, symptoms, and prevention

267 Out of the 391 adolescents included in the study, 317 (81.1%) reported that they had heard of  
268 malaria and of those, 87.7% (n=278), reported that malaria is transmitted by mosquito bites.  
269 However, some participants reported other factors as possible means of malaria transmission,  
270 including sleeping with a sick person (12.9%, n=41), through an insect bite (5.7%, n=18), lack  
271 of body hygiene (6.3%, n=20). Overall, 7.3% (n=23) of the participants did not know how  
272 malaria is transmitted. The most commonly reported symptoms of malaria by adolescents were  
273 headache (89.3%, n=283), vomiting (52.4%, n=166), abdominal pain (30.3%, n=96), chills  
274 (10.4%, n=33), fatigue (6.0%, n=19), and loss of appetite (5.1%, n=16).

275  
276 The majority of the adolescents (84.5%, n=268) mentioned mosquito nets as a preventive  
277 measure against malaria. Other preventive measures noted by adolescents included mosquito's  
278 coils (8.8%, n=28), weeding (7.9%, n=25), insecticide spray (4.7%, n=15), antimalarial drugs  
279 (5.1%, n=16), sewage disposal (4,7%, n=15), wearing of long clothes (3.8%, n=12). Six percent  
280 (n=19) of adolescents did not know any malaria preventive measures. Approximately, one-  
281 third (34.4%; 95%CI: 29.3% - 39.8%, n=109) of adolescents had good knowledge of the cause,  
282 signs and symptoms, and preventive measures of malaria (Table 2).

283 Table 2. Participant knowledge of malaria transmission, signs and symptoms, and prevention  
284 methods

285

| Variable                      | Category                 | Frequency | Percentage |
|-------------------------------|--------------------------|-----------|------------|
| Have you heard about malaria? | No                       | 74        | 18.9%      |
|                               | Yes                      | 317       | 81.1%      |
| How is malaria transmitted?   | Sleep with a sick person | 41        | 12.9%      |

|                                   |                      |     |       |
|-----------------------------------|----------------------|-----|-------|
|                                   | Mosquito bite        | 278 | 87.7% |
|                                   | Insect bite          | 18  | 5.7%  |
|                                   | Lack of body hygiene | 20  | 6.3%  |
|                                   | Oil consumption      | 1   | 0.3%  |
|                                   | Contaminated food    | 8   | 2.5%  |
|                                   | Dirt                 | 3   | 0.9%  |
|                                   | Don't know           | 23  | 7.3%  |
|                                   | Other†               | 3   | 0.9%  |
| <b>Malaria signs and symptoms</b> | Headache             | 283 | 89.3% |
|                                   | Abdominal pain       | 96  | 30.3% |
|                                   | Chills               | 33  | 10.4% |
|                                   | Fatigue              | 19  | 6.0%  |
|                                   | Loss of appetite     | 16  | 5.1%  |
|                                   | Vomiting             | 166 | 52.4% |
|                                   | Fever                | 6   | 1.9%  |
|                                   | Don't know           | 10  | 3.2%  |
|                                   | other*               | 4   | 1.3%  |
| <b>Malaria prevention</b>         | Mosquito net         | 268 | 84.5% |
|                                   | Spray insecticide    | 15  | 4.7%  |
|                                   | Mosquito coils       | 28  | 8.8%  |
|                                   | Antimalarial drug    | 16  | 5.1%  |
|                                   | Weeding              | 25  | 7.9%  |
|                                   | Long cloves          | 12  | 3.8%  |
|                                   | Sewage disposal      | 15  | 4.7%  |
|                                   | Don't know           | 19  | 6.0%  |
|                                   | Other**              | 8   | 2.5%  |
| <b>Knowledge***</b>               | Poor                 | 208 | 65.6% |
|                                   | Good                 | 109 | 34.4% |

286 † water and non-use of net

287 \*aches and body swelling

288 \*\* go to hospital, traditional treatment, cleanliness, cannot be prevented

289 \*\*\* knowledge score calculated by summing up the score of knowledge on malaria

290 transmission, signs and prevention, then categorized in accordance to the median of the total  
291 score

292

293 Participants were mostly (87.1%, n=276) informed about malaria by health workers,  
294 specifically by community health workers (CHWs) (53.3%, n=169) and nurses (33.7%,  
295 n=107). Other sources of information included school (19.8%, n=63), radio (16.4%, n=52),  
296 television (16.1%, n=51), and neighborhood (community members) (12.0%, n=38) (Fig 1).

## 297 Attitude towards malaria

298 Overall, 88.0% (n=279) of the study participants believe that everybody can contract malaria  
 299 and 92.1% (n=292) perceived the disease as deadly. The majority of the participants (85.5%,  
 300 n=271) perceived malaria as a preventable disease. Furthermore, participants indicated the  
 301 necessity to be tested prior malaria treatment initiation (86.7%, n=275) and the necessity to  
 302 complete a full course of treatment when given (84.5%, n=268). However, 46.7% (n=148)  
 303 believed that malaria could be cured without medical treatment. Considering the total score of  
 304 attitude, three-quarters (75.1%; 95% CI: 70.0% - 79.5%, n=238) of the participants had a  
 305 positive attitude (Table 3).

306 Table 3. Attitudes of the study participants towards malaria  
 307

| Variable                                                            | Totally agree |       | Agree |       | Neutral |       | Disagree |       | Totally disagree |       |
|---------------------------------------------------------------------|---------------|-------|-------|-------|---------|-------|----------|-------|------------------|-------|
|                                                                     | N             | %     | N     | %     | N       | %     | N        | %     | N                | %     |
| <b>Everybody can have malaria</b>                                   | 214           | 67.5% | 65    | 20.5% | 13      | 4.1%  | 19       | 6.0%  | 6                | 1.9%  |
| <b>Malaria is deadly</b>                                            | 197           | 62.1% | 95    | 30.0% | 16      | 5.1%  | 5        | 1.6%  | 4                | 1.3%  |
| <b>Malaria can be cured without medical treatment</b>               | 115           | 36.3% | 33    | 10.4% | 42      | 13.3% | 87       | 27.4% | 40               | 12.6% |
| <b>Malaria can be prevented</b>                                     | 141           | 44.5% | 130   | 41.0% | 23      | 7.3%  | 14       | 4.4%  | 9                | 2.8%  |
| <b>It is important to be tested before taking malaria treatment</b> | 121           | 38.2% | 154   | 48.6% | 34      | 10.7% | 5        | 1.6%  | 3                | 0.9%  |
| <b>It is necessary to finish malaria treatment</b>                  | 123           | 38.8% | 145   | 45.7% | 41      | 12.9% | 5        | 1.6%  | 3                | 0.9%  |
| <b>Attitude*</b>                                                    |               |       |       |       |         |       |          |       |                  |       |
| <b>Positive</b>                                                     |               |       |       |       |         |       |          |       | 238<br>(75.1%)   |       |
| <b>Negative</b>                                                     |               |       |       |       |         |       |          |       | 79<br>(24.9%)    |       |

308 \*calculated by summing up the score across the items used to measure attitude and  
 309 categorized based on the median of the total score

## 310 Practice of malaria prevention

311 Forty-five percent (45.4%, n=144) of the study participants reported that their households  
 312 owned bed nets. The proportion of adolescents who reported using nets was 33.1% (n=105)  
 313 and those who declared having slept under a net the previous night of the survey was 27.8%  
 314 (n=88). Out of the 105 study participants who reported bed net usage, 31.4% (n=33) stated  
 315 using the bed nets in both the dry and rainy seasons and 71.4% (n=75) reported using a bed net  
 316 every night.

317 Forty-five percent of adolescents (45.1%, n=143) reported using other preventive measures,  
 318 including mosquito coils (60.1%, n=86), insecticide spraying (30.8%, n=44), and wearing of  
 319 long cloves (27.3%, n=39). Approximately one-third, 32.8% (95%CI: 27.8%-38.2%), (n=104)  
 320 of the participants have good practices in regard to malaria prevention (Table 4).

321 Table 4. Malaria prevention practices of the study participants  
 322

| Variable                                     | Category                   | Frequency | Percentage |
|----------------------------------------------|----------------------------|-----------|------------|
| <b>Household owns a bed net (317)</b>        | Yes                        | 144       | 45.4%      |
|                                              | No                         | 173       | 54.6%      |
| <b>Bed net use (317)</b>                     | Yes                        | 105       | 33.1%      |
|                                              | No                         | 212       | 66.9%      |
| <b>Bed net used the previous night (317)</b> | Yes                        | 88        | 27.8%      |
|                                              | No                         | 229       | 72.2%      |
| <b>Season of bed use (105)</b>               | Rainy season               | 71        | 67.6%      |
|                                              | Dry season                 | 1         | 0.9%       |
|                                              | All seasons                | 33        | 31.4%      |
| <b>Frequency of bed net use (105)</b>        | Less than 3 times per week | 1         | 0.9%       |
|                                              | 3- 6 times per week        | 29        | 27.6%      |
|                                              | Every night                | 75        | 71.4%      |
| <b>Use other measures? (317)</b>             | Yes                        | 143       | 45.1%      |
|                                              | No                         | 174       | 54.9%      |
| <b>Other preventives measures used (143)</b> | Mosquito coils             | 86        | 60.1%      |
|                                              | Insecticide spray          | 44        | 30.8%      |
|                                              | Grass cleaning             | 2         | 1.4%       |
|                                              | Sewage cleaning            | 1         | 0.7%       |
|                                              | Long cloves                | 39        | 27.3%      |
|                                              | Hand cream                 | 10        | 3.2%       |
|                                              | Other*                     | 6         | 1.9%       |



|                                          |      |     |       |
|------------------------------------------|------|-----|-------|
| <b>Prevention practice level** (317)</b> | Good | 104 | 32.8% |
|                                          | Bad  | 213 | 67.2% |

323 \* Topical repellent, traditional treatment, blanket, shea oil, personal hygiene

324 \*\* defined based on bed net ownership and usage

325

326 Twenty-seven percent (27,1%, n= 39) of adolescents reported not using the bed net. The main  
 327 reason indicated was that they felt too hot when sleeping under a net (54.1%, n=20). Other  
 328 reasons included the smell of the net (16.2%, n=6), “feeling trapped in the net” (10.8%, n= 4),  
 329 “there is no mosquito” (10.8%, n= 4), “there is no malaria currently” (5.4%, n= 2), “don’t have  
 330 access to a bed net” (5.4%, n= 2).

### 331 **Care-seeking practices**

332 Overall, 89.3% of the study participants (n=283) reported having had a malaria episode, and  
 333 among them, 86.2% (n=244) have sought care for this episode. The majority (79.1%, n=193)  
 334 sought care at the health post, while 23.4% (n=57) sought care at the health hut/ DSDOM. Of  
 335 those that sought care, 76.6% (n=187) sought care within 24 hours of the onset of symptoms.  
 336 Altogether, 73.8%, 95%CI: 68.4% - 78.6% (n=209) of the participants demonstrated good care  
 337 seeking practice for malaria (Table 5).

338 Table 5. Malaria care seeking practice among the study participants

339

| <b>Variable</b>                                             | <b>Category</b>  | <b>Frequenc<br/>y</b> | <b>Percentag<br/>e</b> |
|-------------------------------------------------------------|------------------|-----------------------|------------------------|
| <b>Have you ever experienced malaria? (317)</b>             | Yes              | 283                   | 89.3%                  |
|                                                             | No               | 34                    | 10.7%                  |
| <b>Have you sought care? (283)</b>                          | Yes              | 244                   | 86.2%                  |
|                                                             | No               | 39                    | 13.8%                  |
| <b>Where did you seek care? (244)</b>                       | Health post      | 193                   | 79.1%                  |
|                                                             | Health center    | 3                     | 1.2%                   |
|                                                             | Health hut/DSDOM | 57                    | 23.4%                  |
|                                                             | Self-medication  | 3                     | 1.2%                   |
|                                                             |                  |                       |                        |
| <b>Timeliness of care seeking after disease onset (244)</b> | The same day     | 187                   | 76.6%                  |
|                                                             | One day after    | 24                    | 9.8%                   |
|                                                             | Two days after   | 29                    | 11.9%                  |

|                                           |                  |     |       |
|-------------------------------------------|------------------|-----|-------|
|                                           | More than 2 days | 2   | 0.8%  |
|                                           | Don't know       | 2   | 0.8%  |
| <b>Care seeking practice level* (283)</b> | Good             | 209 | 73.8% |
|                                           | Bad              | 74  | 26.1% |

340 \*estimated based on care seeking in a health facility within 24 hours

## 341 **Factors associated with malaria knowledge, attitude, and practices**

### 342 **Malaria causes, symptoms, and prevention knowledge**

343 Table 6 presents the results of the logistic regression model looking at the determinants related  
344 to adolescents' knowledge of the cause, signs and symptoms, and prevention methods for  
345 malaria. Male adolescents were 60% less likely to have good knowledge (aOR:0.40; 95%CI  
346 0.24 - 0.68); compared to female adolescents. The odds of having good knowledge increased  
347 with education level; the odds of having a good knowledge was 5 (aOR:5.43; 95%CI 1.91 –  
348 15.46) and 10 times (aOR:10.41; 95%CI 2.98 – 36.40) higher among adolescents who had  
349 primary and secondary level of education, respectively, compared to those that had not received  
350 any education.

351 Table 6. Logistic regression of the determinants related to malaria knowledge among  
352 adolescents

353

|                                            |                 | <b>Knowledge level</b> |               |                     |                     |                 |
|--------------------------------------------|-----------------|------------------------|---------------|---------------------|---------------------|-----------------|
| <b>Variable</b>                            | <b>Category</b> | <b>Low</b>             | <b>High</b>   | <b>COR (95% CI)</b> | <b>AOR (95% CI)</b> | <b>P</b>        |
| <b>Characteristics of the participants</b> |                 | n (%)                  | n (%)         |                     |                     |                 |
| <b>Age (in years)</b>                      | 10--14          | 125<br>(65.1%)         | 67<br>(34.9%) | 1                   | 1                   |                 |
|                                            | 15 - 19         | 83<br>(66.4%)          | 42<br>(33.6%) | 0.94 (0.59-1.52)    | 0.90 (0.51-1.59)    | 0.705           |
| <b>Sex</b>                                 | Female          | 109<br>(59.2%)         | 75<br>(40.8%) | 1                   | 1                   |                 |
|                                            | Male            | 99<br>(74.4%)          | 34<br>(25.6%) | 0.50 (0.31-0.81)    | 0.40 (0.24-0.68)    | <b>0.001***</b> |
| <b>Education level</b>                     | None            | 35<br>(87.8%)          | 05<br>(12.2%) | 1                   | 1                   |                 |
|                                            | Koranic         | 32<br>(76.2%)          | 10<br>(23.8%) | 2.25 (0.70-7.29)    | 2.67 (0.79 -9.08)   | 0.116           |
|                                            | Primary         | 125<br>(61.3%)         | 79<br>(38.8%) | 4.55 (1.71-12.11)   | 5.43 (1.91-15.46)   | <b>0.002***</b> |

|                     |           |               |               |                    |                    |                 |
|---------------------|-----------|---------------|---------------|--------------------|--------------------|-----------------|
|                     | Secondary | 15<br>(50.0%) | 15<br>(50.0%) | 7.2 (2.21 -23.42)  | 10.41 (2.98-36.40) | <b>0.000***</b> |
| <b>Wealth index</b> | Highest   | 45<br>(64.3%) | 25<br>(35.7%) | 1                  | 1                  |                 |
|                     | Fourth    | 42<br>(60.9%) | 27<br>(39.1%) | 1.16 (0.58 - 2.30) | 1.29 (0.61 - 2.70) | 0.502           |
|                     | Middle    | 45<br>(67.2%) | 22<br>(35.5%) | 0.88 (0.43 - 1.78) | 0.77 (0.36 - 1.65) | 0.507           |
|                     | Second    | 40<br>(64.5%) | 22<br>(35.5%) | 0.99 (0.48 - 2.02) | 1.02 (0.46 - 2.28) | 0.953           |
|                     | Lowest    | 36<br>(73.5%) | 13<br>(26.3%) | 0.65 (0.29 - 1.45) | 0.87 (0.36 - 2.07) | 0.751           |

**Characteristics of the households**

|                        |           |               |               |                    |                    |       |
|------------------------|-----------|---------------|---------------|--------------------|--------------------|-------|
| <b>Education level</b> | None      | 80<br>(58.4%) | 57<br>(41.6%) | 1                  |                    | 1     |
|                        | Koranic   | 80<br>(72.1%) | 31<br>(27.9%) | 0.54 (0.32 - 0.93) | 0.58 (0.32 - 1.05) | 0.073 |
|                        | Primary   | 43<br>(70.5%) | 18<br>(29.5%) | 0.59 (0.31 - 1.12) | 0.56 (0.28 - 1.14) | 0.109 |
|                        | Secondary | 03<br>(50.0%) | 03<br>(50.0%) | 1.40 (0.27 - 7.22) | 0.89 (0.21 - 3.70) | 0.872 |

354 \*\*\* Significant at the 0.01 level

355 **Attitude towards malaria**

356 Household wealth was significantly associated with participants' attitudes towards malaria.  
357 Compared to adolescents from households in the highest wealth quintile, those from  
358 households in the fourth, second, and lowest wealth quintiles were less likely to have positive  
359 attitudes towards malaria, with an average decrease of 71% (aOR:0.29, 95%CI 0.11 - 0.78),  
360 87% (aOR:0.13, 95%CI 0.05 - 0.34) and 82% (aOR:0.18, 95%CI 0.06 - 0.51), respectively  
361 (Table 7).

362 Table 7. Logistic regression of the factors associated with attitude of the participants towards  
363 malaria  
364

| Variable       | Category | Malaria attitude level |               |                   |                 | P     |
|----------------|----------|------------------------|---------------|-------------------|-----------------|-------|
|                |          | Positive               | Negative      | COR (95% CI)      | AOR (95% CI)    |       |
| Age (in years) | 10--14   | 142<br>(73.9%)         | 50<br>(26.0%) | 1                 | 1               |       |
|                | 15 - 19  | 96                     | 29            | 1.17(0.69 - 1.97) | 1.03(0.55-1.92) | 0.927 |

|                        |           |                |               |                   |                   |                 |
|------------------------|-----------|----------------|---------------|-------------------|-------------------|-----------------|
|                        |           | (76.8%)        | (23.2%)       |                   |                   |                 |
| <b>Sex</b>             | Female    | 139<br>(75.5%) | 45<br>(24.3%) | 1                 | 1                 |                 |
|                        | Male      | 99<br>(74.4%)  | 34<br>(25.6%) | 0.94(0.56 - 1.58) | 0.90(0.52 - 1.55) | 0.705           |
| <b>Education level</b> | None      | 33<br>(80.5%)  | 08<br>(19.5%) | 1                 | 1                 |                 |
|                        | Koranic   | 28<br>(66.7%)  | 14<br>(33.3%) | 0.48(0.18 - 1.33) | 0.48(0.16 - 1.38) | 0.172           |
|                        | Primary   | 150<br>(73.5%) | 54<br>(26.5%) | 0.67(0.29 - 1.55) | 0.58(0.23 - 1.44) | 0.239           |
|                        | Secondary | 27<br>(90.0%)  | 03<br>(10.0%) | 2.18(0.53 - 9.06) | 1.30(0.30 - 5.67) | 0.730           |
| <b>Wealth index</b>    | Highest   | 64<br>(91.4%)  | 06 (8.6%)     | 1                 | 1                 |                 |
|                        | Fourth    | 51<br>(73.9%)  | 18<br>(26.1%) | 0.28(0.10 - 0.76) | 0.29(0.11 - 0.78) | <b>0.015**</b>  |
|                        | Middle    | 57<br>(85.1%)  | 10<br>(14.9%) | 0.53(0.18 - 1.56) | 0.57(0.19 - 1.69) | 0.312           |
|                        | Second    | 35<br>(56.4%)  | 27<br>(43.6%) | 0.12(0.05 - 0.33) | 0.13(0.05 - 0.34) | <b>0.000***</b> |
|                        | Lowest    | 31<br>(63.3%)  | 18<br>(36.7%) | 0.16(0.06 - 0.46) | 0.18(0.06 - 0.51) | <b>0.001***</b> |

365 \*\* Significant at the 0.05 level

366 \*\*\* Significant at the 0.01 level

### 367 **Malaria prevention practices**

368 Adolescents who demonstrated a positive attitude towards malaria were two times (aOR:2.32;  
369 95%CI 1.21 - 4.44) more likely to report engaging in good malaria prevention practices than  
370 those with a negative attitude. A significant association was found between household wealth  
371 and adolescent prevention practices: compared to adolescents from households in the highest  
372 wealth quintile, those from households in the fourth (aOR:0.40; 95%CI 0.19 - 0.85), middle  
373 (aOR:0.32; 95%CI 0.15 - 0.68) and second wealth quintiles (0.44; 95%CI 0.20- 0.94) were  
374 60%, 68% and 56%, less likely, respectively, to practice good malaria prevention. Having a  
375 household head with a koranic school education was associated with good malaria prevention  
376 practice (aOR:2.03; 95%CI 1.13 - 3.65) compared to adolescents from households where the  
377 household head received no education (Table 8).

378 Table 8. Logistic regression of the factors associated with malaria prevention practice  
379

| Variable                              | Category         | Malaria prevention practice |                |                    |                    | P              |
|---------------------------------------|------------------|-----------------------------|----------------|--------------------|--------------------|----------------|
|                                       |                  | Good                        | Poor           | COR (95% CI)       | AOR (95% CI)       |                |
| Characteristics of the participants   |                  | n(%)                        | n(%)           |                    |                    |                |
| Age (in years)                        | 10-14            | 74<br>(31.9%)               | 158<br>(68.1%) | 1                  | 1                  |                |
|                                       | 15-19            | 46<br>(28.9%)               | 113<br>(71.1%) | 0.87 (0.56 - 1.35) | 0.65 (0.36 - 1.18) | 0.157          |
| Sex                                   | Female           | 66<br>(30.1%)               | 153<br>(69.9%) | 1                  | 1                  |                |
|                                       | Male             | 54<br>(31.4%)               | 118<br>(68.6%) | 1.06 (0.69 - 1.63) | 1.25 (0.72 - 2.16) | 0.431          |
| Educational level                     | No education     | 20<br>(48.8%)               | 21<br>(51.2%)  | 1                  | 1                  |                |
|                                       | Koranic school   | 16<br>(38.1%)               | 26<br>(61.1%)  | 0.65 (0.27 - 1.55) | 0.60 (0.23 - 1.59) | 0.305          |
|                                       | Primary school   | 59<br>(28.9%)               | 145<br>(71.1%) | 0.43 (0.22 - 0.87) | 0.40 (0.18 - 0.89) | <b>0.025**</b> |
|                                       | Secondary school | 09<br>(30.0%)               | 21<br>(70.0%)  | 0.45 (0.17 - 1.22) | 0.38 (0.12 - 1.22) | 0.104          |
| Wealth index                          | Highest          | 38<br>(48.7%)               | 40<br>(51.3%)  | 1                  | 1                  |                |
|                                       | Fourth           | 25<br>(32.0%)               | 33<br>(67.9%)  | 0.50 (0.26-0.95)   | 0.40 (0.19 - 0.85) | <b>0.018**</b> |
|                                       | Middle           | 15<br>(20.0%)               | 64<br>(81.0%)  | 0.25 (0.12-0.51)   | 0.32 (0.15 - 0.68) | <b>0.003**</b> |
|                                       | Second           | 21<br>(26.9%)               | 57<br>(73.1%)  | 0.39 (0.20 - 0.76) | 0.44 (0.20- 0.94)  | <b>0.035**</b> |
|                                       | Lowest           | 21<br>(26.9%)               | 57<br>(73.1%)  | 0.39 (0.20 - 0.76) | 0.58 (0.24 - 1.42) | 0.232          |
| Attitude level                        | Negative         | 15<br>(20.0%)               | 64<br>(81.0%)  | 1                  | 1                  |                |
|                                       | Positive         | 89<br>(37.4%)               | 149<br>(62.6%) | 2.55 (1.37 - 4.74) | 2.32 (1.21 - 4.44) | <b>0.011**</b> |
| Knowledge level                       | Low              | 74<br>(35.6%)               | 134<br>(64.4%) | 1                  | 1                  |                |
|                                       | High             | 30<br>(27.5%)               | 79<br>(72.5%)  | 0.69 (0.41 - 1.14) | 0.79 (0.45 - 1.37) | 0.403          |
| Characteristics of the household head |                  |                             |                |                    |                    |                |
| Educational level                     | No education     | 40<br>(24.4%)               | 124<br>(75.6%) | 1                  | 1                  |                |
|                                       | Koranic school   | 58<br>(43.0%)               | 77<br>(57.0%)  | 2.33 (1.43 - 3.83) | 1.80 (1.00 - 3.26) | <b>0.048**</b> |

|  |                  |               |               |                    |                    |       |
|--|------------------|---------------|---------------|--------------------|--------------------|-------|
|  | Primary school   | 17<br>(21.2%) | 63<br>(78.7%) | 0.84 (0.44 - 1.59) | 0.88 (0.44 - 1.77) | 0.722 |
|  | Secondary school | 05<br>(55.6%) | 04<br>(44.4%) | 3.88 (0.99-15.16)  | 6.32(0.62 - 64.20) | 0.119 |

380 \*\* Significant at the 0.05 level

### 381 Malaria care seeking behavior

382 The odds of a good care-seeking behavior for malaria was lower among adolescents from  
 383 households in the second wealth quintile (aOR:0.35; 95 CI% 0.15 - 0.80) compared to those  
 384 from the highest wealth quintile. In addition, the odds of good care-seeking behavior was lower  
 385 among adolescents aged 15-19 years old (aOR:0.57, 95%CI: 0.32 - 1.02) compared to those  
 386 aged 10-14 years old, with a marginal effect (Table 9)

387 Table 9. Factors associated with malaria care-seeking behavior

388

|                |          | Malaria care seeking practices |           |                   |                   |               |
|----------------|----------|--------------------------------|-----------|-------------------|-------------------|---------------|
| Variable       | Category | Good                           | Bad       | COR (95% CI)      | AOR (95% CI)      | P             |
| Age (in years) | 10--14   | 135(77.1%)                     | 40(22.9%) | 1                 | 1                 |               |
|                | 15 - 19  | 74(68.5%)                      | 34(31.5%) | 0.64(0.38 - 1.11) | 0.57(0.32 - 1.02) | 0.056         |
| Sex            | Female   | 123(58.8%)                     | 38(51.3%) | 1                 | 1                 |               |
|                | Male     | 86(41.1%)                      | 36(48.6%) | 0.74(0.43 - 1.26) | 0.68(0.38 - 1.19) | 0.174         |
| Wealth index   | Highest  | 50(82.0%)                      | 11(18.0%) | 1                 | 1                 |               |
|                | Fourth   | 51(78.5%)                      | 14(21.5%) | 0.80(0.33 - 1.94) | 0.87(0.36 - 2.14) | 0.756         |
|                | Middle   | 40(70.2%)                      | 17(29.8%) | 0.52(0.22 - 1.23) | 0.52(0.22 - 1.26) | 0.147         |
|                | Second   | 35(60.3%)                      | 23(39.7%) | 0.33(0.14 - 0.78) | 0.35(0.15 - 0.80) | <b>0.013*</b> |
|                | Lowest   | 33(78.6%)                      | 9(12.2%)  | 0.81(0.30 - 2.16) | 0.86(0.32 - 2.32) | 0.772         |

389 \*\* Significant at the 0.05 level

390

## 391 Discussion

392 Many studies have been conducted to examine malaria control and prevention knowledge,  
 393 attitudes, and practices; however, most studies have focused exclusively on adults.

394 Adolescents, an emerging high risk group, have received limited attention. To address this  
395 evidence gap, our study sought to assess malaria knowledge, attitudes, and practices and key  
396 determinants among adolescents living in an area of high malaria transmission in southern  
397 Senegal.

398 In general, most of the adolescents demonstrated awareness of malaria transmission,  
399 symptoms, and prevention methods. This result corroborates those reported by other studies  
400 conducted in Tanzania [22], in Nigeria [41–44], in India [45], and in Ethiopia [46]. The study  
401 participants reported CHWs and nurses as their main sources of malaria-related information,  
402 which was a similar finding to a study conducted in Nigeria among school adolescents [42].  
403 This result could be explained by the fact that nurses and CHWs are often the primary points  
404 of contact for adolescent health care services in many remote settings, including in Senegal.  
405 Consequently, health care providers, such as nurses and CHWs, are well positioned to support  
406 implementation of malaria awareness strategies targeting adolescents. Conversely, in other  
407 studies conducted in Ethiopia [46] and India [45] among school-going adolescents, radio and  
408 television were reported as the main sources of information on malaria.

409 However, most of the adolescents did not report fever as a significant symptom, and 6 -7%  
410 lacked knowledge on malaria transmission and prevention. This result highlights the need for  
411 improved health-related information among this group of population. Engaging and  
412 empowering adolescents to disseminate malaria-related information in order to sensitize their  
413 peers could be an approach to fill this gap [47]. School and community-based health education  
414 programs could be used to reach this goal.

415 Overall, the level of malaria knowledge regarding the cause, symptoms, and prevention is poor  
416 for the majority of the participants. The present result is similar to the findings of a study  
417 conducted in Nigeria among in-school adolescents [41]. This finding is surprising, as most of

418 the adolescents had a primary or secondary level of education and information on malaria and  
419 how to prevent transmission are integrated into the school curriculum in Senegal. In the current  
420 study, males were significantly less likely to possess a good knowledge of malaria compared  
421 to their female counterparts. Adolescents' malaria knowledge was positively associated with  
422 their education level, with adolescents who possessed a primary and secondary level of  
423 education level 5 and 10 times more likely to have a good malaria knowledge, compared  
424 adolescents who had received no education. This could be explained by the fact that educated  
425 people are more likely to access health information and have additional opportunities to be  
426 reached by messages on malaria control and prevention [48,49].

427 In terms of attitude, most of the participants agreed that everyone is at risk of malaria and  
428 perceived the disease to be deadly. In addition, the majority of adolescents believe it is  
429 important to be tested for malaria before taking a malaria treatment and to complete the  
430 treatment when given. Similar findings were shown in a study conducted in Nigeria;  
431 participants also perceived malaria as deadly [42]. In our study, most adolescents believe  
432 malaria to be a preventable disease, a result that is consistent with another study conducted in  
433 Nigeria [43]. Despite many believe malaria to be preventable, just under half of the adolescents  
434 stated that malaria can be cured without any medical treatment. This finding justifies the  
435 important need to improve communication for social behavior change among adolescents.  
436 Adolescents' attitudes toward malaria were associated with household wealth; with generally  
437 more positive attitudes among adolescents from wealthier households, and vice-versa, more  
438 negative attitudes were associated with adolescents from poorer households. This finding could  
439 be explained by the fact that individuals from wealthier households are more likely to access  
440 health information on malaria, and therefore could better understand the disease, its prevention  
441 methods as well as its seriousness [48,49].



442 Regarding malaria prevention practices, less than half of the participants reported that their  
443 household own bed nets, around a third reported bed net usage, and nearly all of those who use  
444 a bed net, reported using the net between 3 to 6 times a week, or every night. The proportion  
445 of net utilization among adolescents in this study is lower compared to that indicated in studies  
446 conducted in Tanzania [22] and in Nigeria [50], but higher than the proportion reported in India  
447 [45], in other studies carried out in Nigeria [42,51], and in Kenya [52]. Every three years in  
448 Senegal, free Long-Lasting Insecticide Nets (LLINs) are distributed to the population through  
449 mass campaigns to achieve universal coverage of LLIN, as recommended by WHO [53]. The  
450 latest campaign was carried out in 2019 and the next campaign scheduled for 2022 has not been  
451 conducted yet by the time of this study. The low proportion of bed net ownership reported in  
452 this study could be explained by the fact that the study was conducted several years after a  
453 mass LLIN campaign where the majority of the distributed nets are likely no longer being used  
454 or functional. Indeed, while LLIN are expected to last at least 3 years, studies on LLIN  
455 durability, revealed that under routine conditions LLIN can lose effectiveness because they are  
456 physically damaged, repurposed or discarded [54,55]. Routine distribution of LLINs is also  
457 carried out at community level and in health facilities [14]. However, in the health-based  
458 routine distribution system, LLINs are only distributed free of charge for children under five  
459 and pregnant women. The low coverage of LLINs reported in this study, highlights the need  
460 for improved coverage and access. This could be achieved by expanding the target of the  
461 routine distribution to adolescents to keep them covered between mass campaigns [47]. Other  
462 channels should also be considered by the NMCP, to maintain continuous distribution and  
463 sustain LLIN coverage [56,57].

464 The study revealed an important gap between LLIN ownership and LLIN usage with 25.7% of  
465 the participants reported not using the bed net, despite they have access to one. The main reason  
466 indicated was that they felt too hot when sleeping under a net. This finding justifies the

467 necessity to reinforce sensitization in order to raise awareness among adolescents on the  
468 benefits of usage of LLINs. This could be achieved through an adolescent-friendly health  
469 education program [47].

470 Overall, the level of good prevention practices was low. Factors associated with good  
471 prevention practice included positive attitude, adolescent education level, as well as the  
472 education level of the household head and household wealth. The odds of having a good  
473 prevention practice was 2 folds higher among adolescents with a positive attitude, as compared  
474 to those with a negative attitude. This finding is consistent with those indicated in studies  
475 conducted in Ethiopia [40,49] and could be explained by the fact that the perception of the  
476 susceptibility and the threat related to malaria, and the belief in the effectiveness of the methods  
477 to avoid the disease can motivate the decision to act and adhere to prevention measures [58,59].  
478 This could also be explained as an increase in knowledge and favorable attitudes of an  
479 individual towards a disease, its risk factor, its seriousness, its mechanism of prevention, will  
480 lead to an increase in the probability of practicing preventive measures [40]. Furthermore, the  
481 odds of applying a good practice of prevention is around 2 times higher in adolescents whose  
482 household head has a koranic education level compared to those with no education.  
483 Adolescents who belonged to households from the fourth, the middle, and the second wealth  
484 quintiles were less likely to engage in prevention practices compared to those from households  
485 in the highest wealth index. This result supports the findings of a study conducted in Nigeria,  
486 concluding that higher economic class is associated with LLIN use [43] and another one  
487 conducted in Cameroon showing that wealthier people are more likely to apply good practices  
488 of malaria prevention [48]. LLINs are distributed through mass campaign approach and this  
489 strategy has been shown to ensure equitable LLIN access [53,60,61]. Participants who belong  
490 to the highest wealth index may have more opportunities to access information on malaria  
491 prevention including the benefits of bed-net usage; this could increase their awareness and

492 therefore lead to higher LLIN use compared to other wealth indexes. However, this result is  
493 not in line with findings from other studies that reported a decrease in net usage with the  
494 increase of the wealth index [62,63].

495 Overall, the level of care-seeking behavior was good for most of the study participants. The  
496 majority of adolescents reported having sought care for malaria in health facilities including a  
497 health center, a health post, a health hut, or from a CHW (DSDOM), within 24 hours of the  
498 start of the symptoms. This finding is similar to those of studies conducted in Nigeria [41], in  
499 Tanzania [22], and in India [45], in which most of the adolescents reported going to the hospital  
500 for malaria treatment. Regarding the associated factors, adolescents from the second wealth  
501 quintile are less likely to have good care-seeking behavior compared to those of the highest  
502 one. Since malaria treatment is free, financial resources for the transport to get to the health  
503 facilities and to pay the consultation fees may explain this difference between individuals from  
504 the second and the highest wealth indexes. This result highlights inequity in health care access  
505 among adolescents; efforts are thus needed, mainly among those from the lowest wealth  
506 households to ensure access to care.

## 507 **Limitation of the study**

508 The cross-sectional design of the study can lead to some bias including recall bias, and reflects  
509 information collected at a specific time point, and this information may be different in another  
510 period. However, to minimize this recall bias, the study has been conducted during the malaria  
511 transmission season. In addition, the estimates could have been underestimated or  
512 overestimated due to the fact that certain information collected in the study were self-reported  
513 by the participants. For instance, the proportion of households that own bed nets could have  
514 been under-reported if reported not owning a bed net is thought to be linked to receiving a new  
515 or additional bed net [64]. The use of bed nets also was self-reported and could have been

516 overestimated by the participants for social desirability. It is shown that self-reports  
517 overestimate adherence of bed net [65,66].

## 518 **Conclusion**

519 The study revealed that adolescents, generally have poor levels of malaria knowledge and low  
520 uptake of malaria prevention and control interventions. Targeted interventions for high-risk  
521 adolescents are needed, that focus on improving their knowledge of the disease and effective  
522 preventive measures, and on increasing their access to health care services and LLINs.

## 524 **Acknowledgments**

525 The authors acknowledge Dr Baba Camara, Head of the District Health of Saraya, and his team  
526 who facilitated the conduct of the study in the health district, as well as the population of the  
527 study area for their participation in the study.

528

## 529 **References**

530

531 1. World Health Organization. World malaria report 2020: 20 years of global progress and  
532 challenges. Geneva; 2020.

533 2. Mbunge E, Millham R, Sibiyana N, Takavarasha S. Is malaria elimination a distant dream?  
534 Reconsidering malaria elimination strategies in Zimbabwe. *Public Health in Practice*.  
535 2021;2:100168.

536 3. Rogerson SJ, Beeson JG, Laman M, Poespoprodjo JR, William T, Simpson JA, et al.  
537 Identifying and combating the impacts of COVID-19 on malaria. *BMC Med*. 2020;18:239.

538 4. World Health Organization. World malaria report 2021. Geneva: World Health  
539 Organization; 2021 [cited 2022 Jan 20]. Available from:  
540 <https://apps.who.int/iris/handle/10665/350147>

541 5. Bashir IM, Nyakoe N, van der Sande M. Targeting remaining pockets of malaria  
542 transmission in Kenya to hasten progress towards national elimination goals: an assessment  
543 of prevalence and risk factors in children from the Lake endemic region. *Malar J*.  
544 2019;18:233.

545 6. Coalson JE, Walldorf JA, Cohee LM, Ismail MD, Mathanga D, Cordy RJ, et al. High  
546 prevalence of Plasmodium falciparum gametocyte infections in school-age children using  
547 molecular detection: patterns and predictors of risk from a cross-sectional study in southern  
548 Malawi. *Malar J*. 2016;15:527.

549 7. Coalson JE, Cohee LM, Buchwald AG, Nyambalo A, Kubale J, Seydel KB, et al.  
550 Simulation models predict that school-age children are responsible for most human-to-  
551 mosquito Plasmodium falciparum transmission in southern Malawi. *Malar J*. 2018;17:147.

552 8. Ishengoma DS, Mmbando BP, Mandara CI, Chiduo MG, Francis F, Timiza W, et al.  
553 Trends of Plasmodium falciparum prevalence in two communities of Muheza district North-  
554 eastern Tanzania: correlation between parasite prevalence, malaria interventions and rainfall  
555 in the context of re-emergence of malaria after two decades of progressively declining  
556 transmission. *Malar J*. 2018;17:252.

- 557 9. Deutsch-Feldman M, Parr JB, Keeler C, Brazeau NF, Goel V, Emch M, et al. The Burden  
558 of Malaria in the Democratic Republic of the Congo. *The Journal of Infectious Diseases*.  
559 2020;jiaa650.
- 560 10. Wotodjo AN, Doucoure S, Diagne N, Sarr FD, Parola P, Gaudart J, et al. Another  
561 challenge in malaria elimination efforts: the increase of malaria among adults after the  
562 implementation of long-lasting insecticide-treated nets (LLINs) in Dielmo, Senegal. *Malar J*.  
563 2018;17:384.
- 564 11. Programme National de Lutte contre le Paludisme (PNLP). Plan Stratégique National de  
565 Lutte contre la Paludisme au Senegal, 2021-2025. 2020.
- 566 12. Programme National de Lutte contre le Paludisme (PNLP). Bulletin épidémiologique  
567 annuel 2019 du paludisme au Sénégal. *Sénégal*; 2020 Février p. 2–54.
- 568 13. Programme National de Lutte contre le paludisme (PNLP). Bulletin Epidémiologique  
569 annuel 2021 du paludisme au Sénégal. Mars 2022 p. 1–76. Available from:  
570 <https://pnlp.sn/bulletin-epidemiologique-annuel/>
- 571 14. Programme National de Lutte contre le Paludisme (PNLP). Bulletin Epidémiologique  
572 annuel 2020 du paludisme au Sénégal. 2021 Mar.
- 573 15. Nankabirwa J, Brooker SJ, Clarke SE, Fernando D, Gitonga CW, Schellenberg D, et al.  
574 Malaria in school-age children in Africa: an increasingly important challenge. *Trop Med Int*  
575 *Health*. 2014;19:1294–309.
- 576 16. Richard V, Gaudart J, Sokhna C, Wotodjo AN, Raoult D, Diagne N. Malaria Risk Factors  
577 in Dielmo, A Senegalese Malaria-Endemic Village, Between October and November of  
578 2013: A Case-Control Study. *The American Journal of Tropical Medicine and Hygiene*.  
579 2015;92:565–8.
- 580 17. Tesfahunegn A, Berhe G, Gebregziabher E. Risk factors associated with malaria outbreak  
581 in Laelay Adyabo district northern Ethiopia, 2017: case-control study design. *BMC Public*  
582 *Health*. 2019;19:484.
- 583 18. Dlamini SV, Liao C-W, Dlamini ZH, Siphopho JS, Cheng P-C, Chuang T-W, et al.  
584 Knowledge of human social and behavioral factors essential for the success of community  
585 malaria control intervention programs: The case of Lomahasha in Swaziland. *Journal of*  
586 *Microbiology, Immunology and Infection*. 2017;50:245–53.
- 587 19. DePina AJ, Dia AK, de Ascensão Soares Martins A, Ferreira MC, Moreira AL, Leal SV,  
588 et al. Knowledge, attitudes and practices about malaria in Cabo Verde: a country in the pre-  
589 elimination context. *BMC Public Health*. 2019;19:850.
- 590 20. Forero DA, Chaparro PE, Vallejo AF, Benavides Y, Gutiérrez JB, Arévalo-Herrera M, et  
591 al. Knowledge, attitudes and practices of malaria in Colombia. *Malar J*. 2014;13:165.
- 592 21. Adhikari B, James N, Newby G, von Seidlein L, White NJ, Day NPJ, et al. Community  
593 engagement and population coverage in mass anti-malarial administrations: a systematic  
594 literature review. *Malar J*. 2016;15:523.

- 595 22. Sumari D, Dillip A, Ndume V, Mugasa JP, Gwakisa PS. Knowledge, attitudes and  
596 practices on malaria in relation to its transmission among primary school children in  
597 Bagamoyo district, Tanzania. *MWJ*. 2016;7:1–7.
- 598 23. Gabriel-Job N, Okagua J. Perception of Malaria Transmission and Preventive Strategies  
599 among Adolescents in Rivers State, South-South Nigeria. *JAMMR*. 2019;1–7.
- 600 24. Seck I, Fall I, Faye O, Ba O, Tal-Dia A. Connaissances, Attitudes et Pratiques des  
601 femmes sur le paludisme dans la zone rurale de Popoungine, Senegal. *Med Trop*.  
602 2008;68:629–33.
- 603 25. Dawaki S, Al-Mekhlafi HM, Ithoi I, Ibrahim J, Atroosh WM, Abdulsalam AM, et al. Is  
604 Nigeria winning the battle against malaria? Prevalence, risk factors and KAP assessment  
605 among Hausa communities in Kano State. *Malar J*. 2016;15:351.
- 606 26. DePina AJ, Dia AK, de Ascensão Soares Martins A, Ferreira MC, Moreira AL, Leal SV,  
607 et al. Knowledge, attitudes and practices about malaria in Cabo Verde: a country in the pre-  
608 elimination context. *BMC Public Health*. 2019;19:850.
- 609 27. Flatie BT, Munshea A. Knowledge, Attitude, and Practice towards Malaria among People  
610 Attending Mekaneeyesus Primary Hospital, South Gondar, Northwestern Ethiopia: A Cross-  
611 Sectional Study. Magalhães LG, editor. *Journal of Parasitology Research*. 2021;2021:1–14.
- 612 28. Tesfay K, Yohannes M, Mardu F, Berhe B, Negash H. Assessment of community  
613 knowledge, practice, and determinants of malaria case households in the rural area of Raya  
614 Azebo district, Northern Ethiopia, 2017. Carvalho LH, editor. *PLoS ONE*.  
615 2019;14:e0222427.
- 616 29. Kala Chouakeu NA, Ngingahi LG, Bamou R, Talipouo A, Ngadjeu CS, Mayi MPA, et al.  
617 Knowledge, Attitude, and Practices (KAP) of Human Populations towards Malaria Control in  
618 Four Ecoepidemiological Settings in Cameroon. Vatandoost H, editor. *Journal of Tropical  
619 Medicine*. 2021;2021:1–11.
- 620 30. Belay B, Gelana T, Gebresilassie A. Malaria prevalence, knowledge, attitude, and  
621 practice among febrile patients attending Chagni health center, Northwest Ethiopia: a cross-  
622 sectional study. *Trop Dis Travel Med Vaccines*. 2021;7:20.
- 623 31. Manana PN, Kuonza L, Musekiwa A, Mpangane HD, Koekemoer LL. Knowledge,  
624 attitudes and practices on malaria transmission in Mamfene, KwaZulu-Natal Province, South  
625 Africa 2015. *BMC Public Health*. 2018;18:41.
- 626 32. Manga IA, Gaye A, Dia A, Kouevidjin E, Dos Reis MR, Niang AS, et al. Knowledge,  
627 attitudes and practices (KAP) to assess the impact of school children’s awareness of malaria  
628 using the MOSKI KIT® tool: study case of some Dakar schools in Senegal. *Malar J*.  
629 2021;20:310.
- 630 33. Agence Nationale de la Statistique et de la Démographie (ANSD) [Sénégal], et ICF.  
631 PROJECTION DE LA POPULATION DE LA REGION DE DAKAR - 2013-2025. [cited  
632 2022 Jan 22]. Available from:  
633 [http://www.ansd.sn/ressources/publications/indicateurs/Projections-demographiques-2013-  
634 2025+.htm](http://www.ansd.sn/ressources/publications/indicateurs/Projections-demographiques-2013-2025+.htm)

- 635 34. The PMI VectorLink Project, Abt Associates Inc. VectorLink Senegal Final  
636 Entomological Report: January 1, 2019 – January 31, 2020. Rockville, MD; 2020 Mar.  
637 Available from: [https://www.pmi.gov/docs/default-source/default-document-](https://www.pmi.gov/docs/default-source/default-document-library/implementing-partner-reports/senegal-2019-entomological-monitoring-final-report.pdf?sfvrsn=4)  
638 [library/implementing-partner-reports/senegal-2019-entomological-monitoring-final-](https://www.pmi.gov/docs/default-source/default-document-library/implementing-partner-reports/senegal-2019-entomological-monitoring-final-report.pdf?sfvrsn=4)  
639 [report.pdf?sfvrsn=4](https://www.pmi.gov/docs/default-source/default-document-library/implementing-partner-reports/senegal-2019-entomological-monitoring-final-report.pdf?sfvrsn=4)
- 640 35. Programme National de Lutte contre le paludisme (PNLP). Plan Sytratégique National de  
641 Lutte contre le Paludisme au Sénégal, 2016-2020. 2015 Oct.
- 642 36. Milligan P, Njie A, Bennett S. Comparison of two cluster sampling methods for health  
643 surveys in developing countries. *Int J Epidemiol.* 2004;33:469–76.
- 644 37. Kuper H, Polack S, Limburg H. Rapid Assessment of Avoidable Blindness. *Community*  
645 *Eye Health J.* 2006;19.
- 646 38. Sixpence A, Nkoka O, Chirwa GC, Milanzi EB, Mangani C, Mathanga DP, et al. Levels  
647 of knowledge regarding malaria causes, symptoms, and prevention measures among  
648 Malawian women of reproductive age. *Malar J.* 2020;19:225.
- 649 39. Agence Nationale de la Statistique et de la Démographie (ANSD) [Sénégal], et ICF.  
650 Enquête Démographique et de Santé Continue (EDS-Continue 2019). Senegal. Rockville,  
651 Maryland, USA; 2019.
- 652 40. Fikrie A, Kayamo M, Bekele H. Malaria prevention practices and associated factors  
653 among households of Hawassa City Administration, Southern Ethiopia, 2020. Di Gennaro F,  
654 editor. *PLoS ONE.* 2021;16:e0250981.
- 655 41. Famoyegun JD. Knowledge, perception, illness experiences and health-seeking behaviour  
656 relating to malaria among in-school adolescents in ibadan north local government area, oyo  
657 state, Nigeria. [cited 2022 Feb 24]. Available from:  
658 <http://adhlui.com.ui.edu.ng/jspui/handle/123456789/1585>
- 659 42. Eko J, Osonwa O, Offiong D. Practices of Malaria Prevention among School Adolescent  
660 within Calabar Metropolis, Southern Nigeria. *Journal of Sociological Research.* 2013;4:241.
- 661 43. Nneka G-J, Okagua J. Perception of Malaria Transmission and Preventive Strategies  
662 among Adolescents in Rivers State, South-South Nigeria. *JAMMR.* 2019;31:1–7.
- 663 44. Udonwa NE, Gyuse AN, Etokidem AJ. Malaria: Knowledge and prevention practices  
664 among school adolescents in a coastal community in Calabar, Nigeria. *Afr J Prim Health*  
665 *Care Fam Med.* 2010;2:4 pages.
- 666 45. Dambhare D, Nimgade SD, Dudhe JY. Knowledge, Attitude and Practice of Malaria  
667 Transmission and Its Prevention among the School Going Adolescents in Wardha District,  
668 Central India. *GJHS.* 2012;4:p76.
- 669 46. Debela Y. Malaria Related Knowledge and Child to Parent Communication Regarding  
670 Prevention and Control of Malaria among Primary School Students in Jimma Zone, South  
671 West Ethiopia. *AJHR.* 2014;2:284.



- 672 47. Tairou F, Diallo A, Sy O, Kone A, Manga IA, Sylla K, et al. Malaria-associated risk  
673 factors among adolescents living in areas with persistent transmission in Senegal: a case–  
674 control study. *Malar J.* 2022;21:193.
- 675 48. Talipouo A, Ngadjeu CS, Doumbe-Belisse P, Djamouko-Djonkam L, Sonhafouo-Chiana  
676 N, Kopya E, et al. Malaria prevention in the city of Yaoundé: knowledge and practices of  
677 urban dwellers. *Malar J.* 2019;18:167.
- 678 49. Legesse Kebede D, Tsegaw Hibstu D, Birhanu BE, Bekele FB. Knowledge, Attitude and  
679 Practice Towards Malaria and Associated Factors in Areka Town, Southern Ethiopia:  
680 Community-Based CrossSectional Study. *J Trop Dis.* 2017 [cited 2022 Jan 22];05. Available  
681 from: [https://www.omicsonline.org/open-access/knowledge-attitude-and-practice-towards-](https://www.omicsonline.org/open-access/knowledge-attitude-and-practice-towards-malaria-and-associatedfactors-in-areka-town-southern-ethiopia-communitybased-crossectiona-2329-891X-1000240.php?aid=91490)  
682 [malaria-and-associatedfactors-in-areka-town-southern-ethiopia-communitybased-](https://www.omicsonline.org/open-access/knowledge-attitude-and-practice-towards-malaria-and-associatedfactors-in-areka-town-southern-ethiopia-communitybased-crossectiona-2329-891X-1000240.php?aid=91490)  
683 [crossectiona-2329-891X-1000240.php?aid=91490](https://www.omicsonline.org/open-access/knowledge-attitude-and-practice-towards-malaria-and-associatedfactors-in-areka-town-southern-ethiopia-communitybased-crossectiona-2329-891X-1000240.php?aid=91490)
- 684 50. Okoli CA, Enna MA. A cross-sectional study on knowledge of, attitudes towards and  
685 practice of malaria prevention and control measures in central nigeria. null. Taylor & Francis;  
686 2014;29:37–42.
- 687 51. Anene-Okeke CG, Isah A, Aluh DO, Ezeme AL. Knowledge and practice of malaria  
688 prevention and management among non-medical students of university of Nigeria, Nsukka.  
689 *Int J Community Med Public Health.* 2018;5:461.
- 690 52. Okoyo C, Mwandawiro C, Kihara J, Simiyu E, Gitonga CW, Noor AM, et al. Comparing  
691 insecticide-treated bed net use to Plasmodium falciparum infection among schoolchildren  
692 living near Lake Victoria, Kenya. *Malar J.* 2015;14:515.
- 693 53. World Health Organisation (WHO). Achieving and maintaining universal coverage with  
694 long-lasting insecticidal nets for malaria control. 2017. Available from:  
695 [http://apps.who.int/iris/bitstream/handle/10665/259478/WHO-HTM-GMP-2017.20-](http://apps.who.int/iris/bitstream/handle/10665/259478/WHO-HTM-GMP-2017.20-eng.pdf;jsessionid=F46CA9D016ADB45526D199B7D1506317?ua=1?sequence=1)  
696 [eng.pdf;jsessionid=F46CA9D016ADB45526D199B7D1506317?ua=1?sequence=1](http://apps.who.int/iris/bitstream/handle/10665/259478/WHO-HTM-GMP-2017.20-eng.pdf;jsessionid=F46CA9D016ADB45526D199B7D1506317?ua=1?sequence=1)
- 697 54. Briet O, Koenker H, Norris L, Wiegand R, Vanden Eng J, Thackeray A, et al. Attrition,  
698 physical integrity and insecticidal activity of long-lasting insecticidal nets in sub-Saharan  
699 Africa and modelling of their impact on vectorial capacity. *Malar J.* 2020;19:310.
- 700 55. Diouf M, Faye BT, Diouf EH, Dia AK, Konate A, Fall FB, et al. Survival of eight LLIN  
701 brands 6, 12, 24 and 36 months after a mass distribution campaign in rural and urban settings  
702 in Senegal. *BMC Public Health.* 2022;22:719.
- 703 56. Worrall E, Were V, Matope A, Gama E, Olewe J, Mwambi D, et al. Coverage outcomes  
704 (effects), costs, cost-effectiveness, and equity of two combinations of long-lasting insecticidal  
705 net (LLIN) distribution channels in Kenya: a two-arm study under operational conditions.  
706 *BMC Public Health.* 2020;20:1870.
- 707 57. Yukich J, Stuck L, Scates S, Wisniewski J, Chacky F, Festo C, et al. Sustaining LLIN  
708 coverage with continuous distribution: the school net programme in Tanzania. *Malar J.*  
709 2020;19:158.
- 710 58. Babalola S, Ricotta E, Awantang G, Lewicky N, Koenker H, Toso M. Correlates of Intra-  
711 Household ITN Use in Liberia: A Multilevel Analysis of Household Survey Data. Gutman J,  
712 editor. *PLoS ONE.* 2016;11:e0158331.

- 713 59. Godin G. Les comportements dans le domaine de la santé. Comprendre pour mieux  
714 intervenir. Les Presses de l'Université de Montréal; 2012.
- 715 60. Finlay AM, Butts J, Ranaivoharimina H, Cotte AH, Ramarosandratana B, Rabarijaona H,  
716 et al. Free mass distribution of long lasting insecticidal nets lead to high levels of LLIN  
717 access and use in Madagascar, 2010: A cross-sectional observational study. Chen M, editor.  
718 PLoS ONE. 2017;12:e0183936.
- 719 61. Noor AM, Amin AA, Akhwale WS, Snow RW. Increasing Coverage and Decreasing  
720 Inequity in Insecticide-Treated Bed Net Use among Rural Kenyan Children. Krishna S,  
721 editor. PLoS Med. 2007;4:e255.
- 722 62. Scott J, Kanyangarara M, Nhama A, Macete E, Moss WJ, Saute F. Factors associated  
723 with use of insecticide-treated net for malaria prevention in Manica District, Mozambique: a  
724 community-based cross-sectional survey. Malar J. 2021;20:200.
- 725 63. Ricotta E, Oppong S, Yukich JO, Briët OJT. Determinants of bed net use conditional on  
726 access in population surveys in Ghana. Malar J. 2019;18:63.
- 727 64. Prudhomme O'Meara W, Smith N, Ekal E, Cole D, Ndege S. Spatial Distribution of  
728 Bednet Coverage under Routine Distribution through the Public Health Sector in a Rural  
729 District in Kenya. Borrmann S, editor. PLoS ONE. 2011;6:e25949.
- 730 65. Lindsay SW, Thomas MB, Kleinschmidt I. Threats to the effectiveness of insecticide-  
731 treated bednets for malaria control: thinking beyond insecticide resistance. The Lancet Global  
732 Health. 2021;9:e1325–31.
- 733 66. Krezanoski PJ, Bangsberg DR, Tsai AC. Quantifying bias in measuring insecticide-  
734 treated bednet use: meta-analysis of self-reported vs objectively measured adherence. Journal  
735 of Global Health. 2018;8:010411.

736

## 737 **Supporting information**

- 738  
739 S1 File. English version of the study questionnaire  
740 (DOCX)  
741 S2 File. KAP STATA dataset  
742 (DTA)

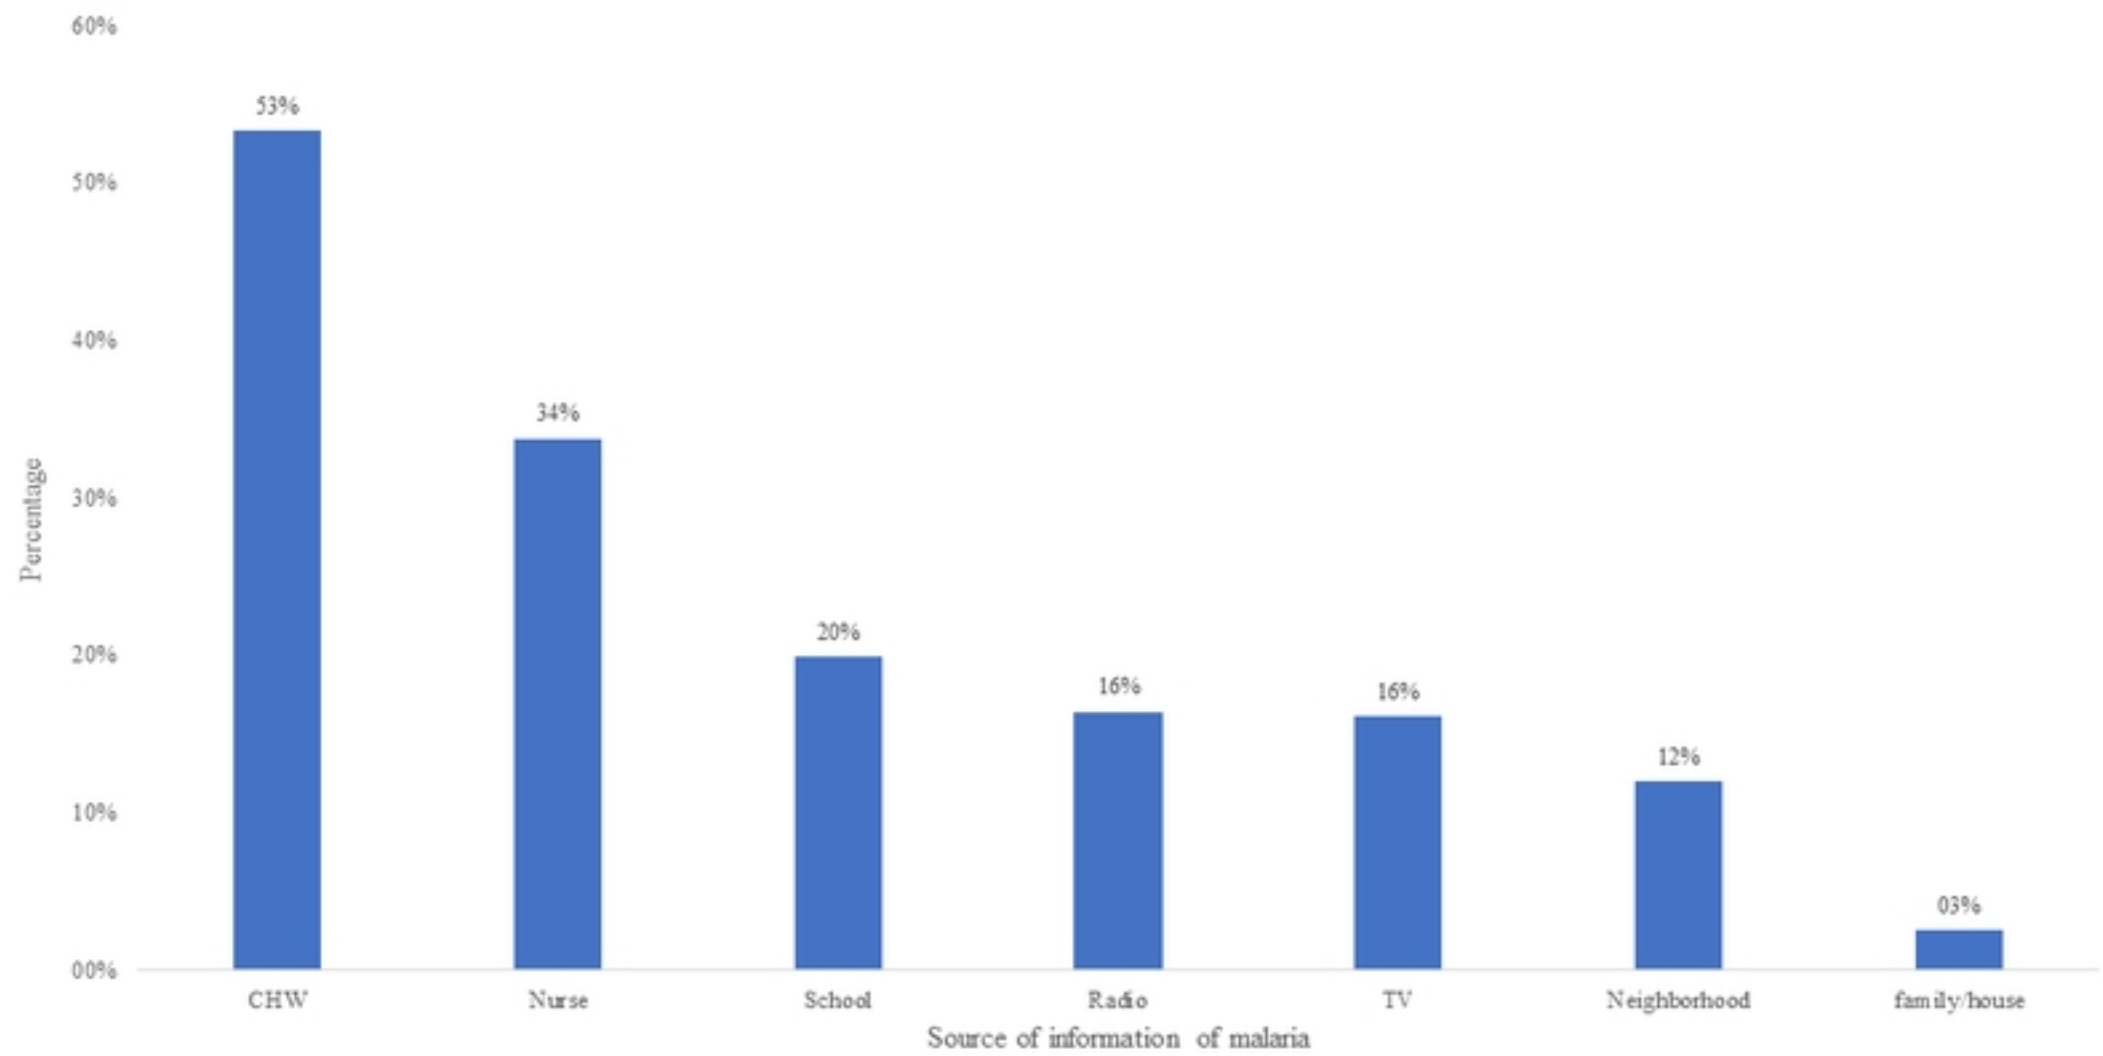

Figure
